# Supplementary material
Source: PubMed Central journal article supplement (PMC3352455)
Supplement: eva0003-0001-SD3.pdf [file eva0003-0001-SD3.pdf]

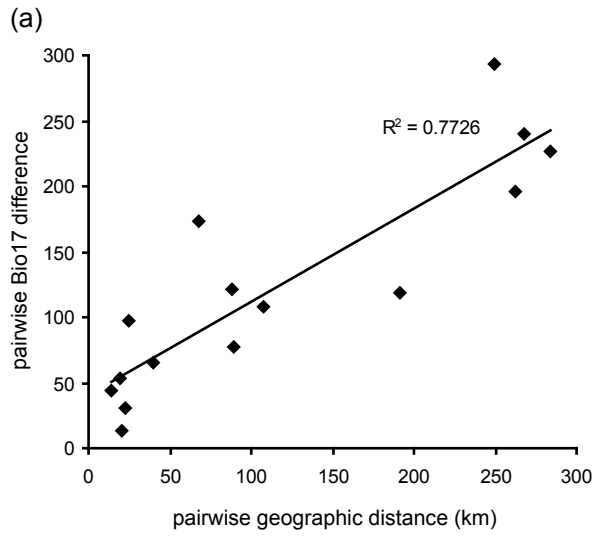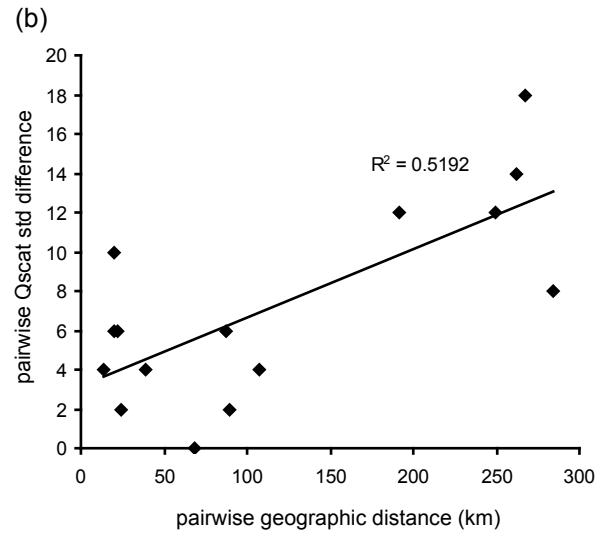

Fig. S5

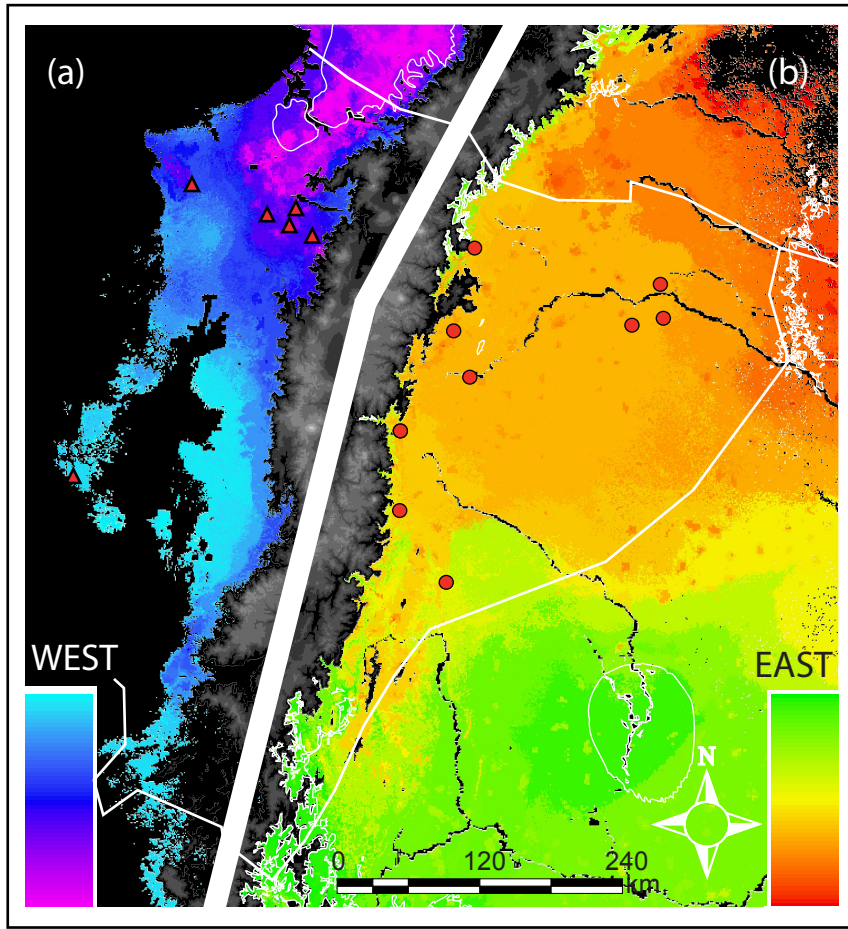

Fig. S6

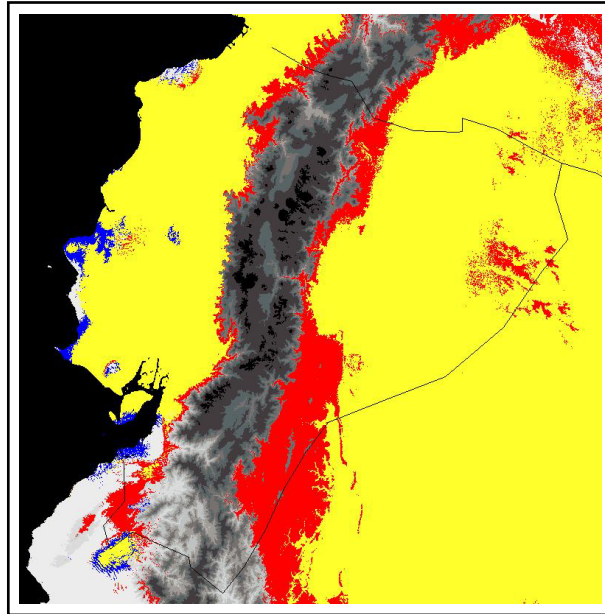

- lost during LGM
- stable area
- gained during LGM

Fig. S7

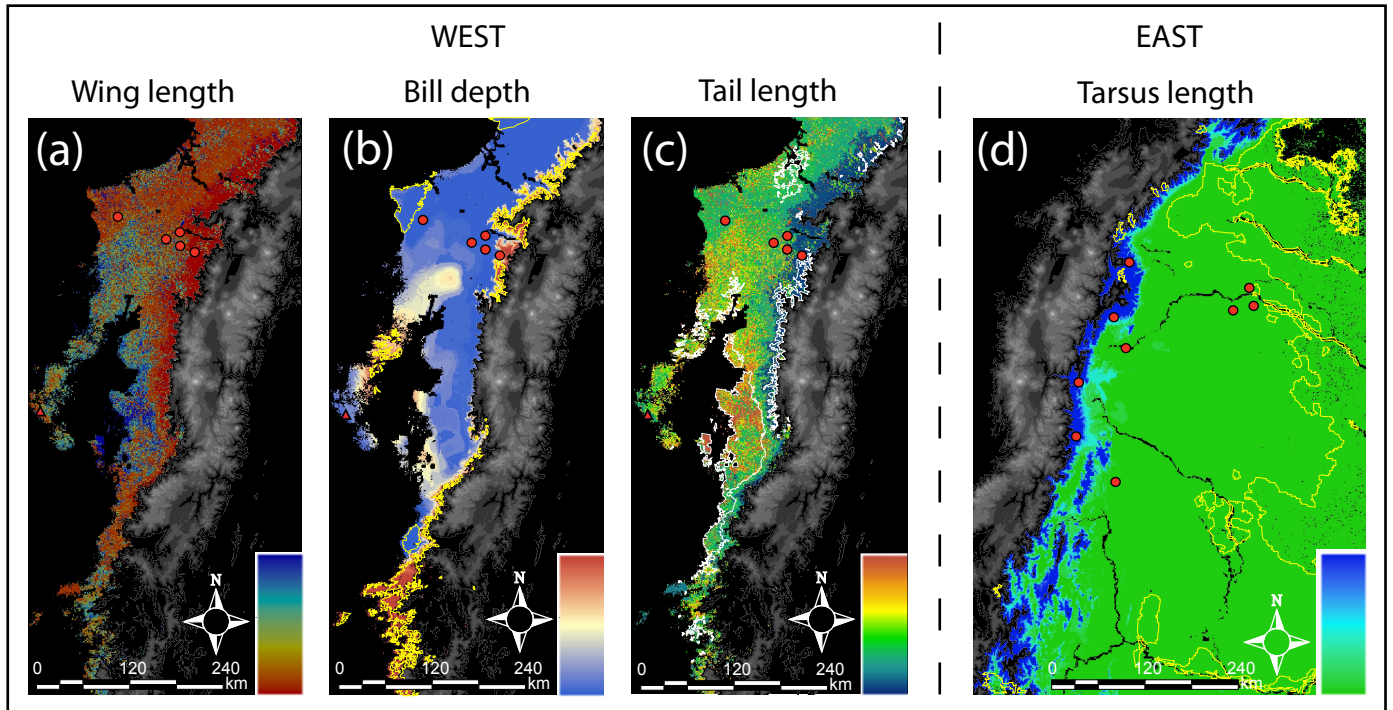

Fig. S8



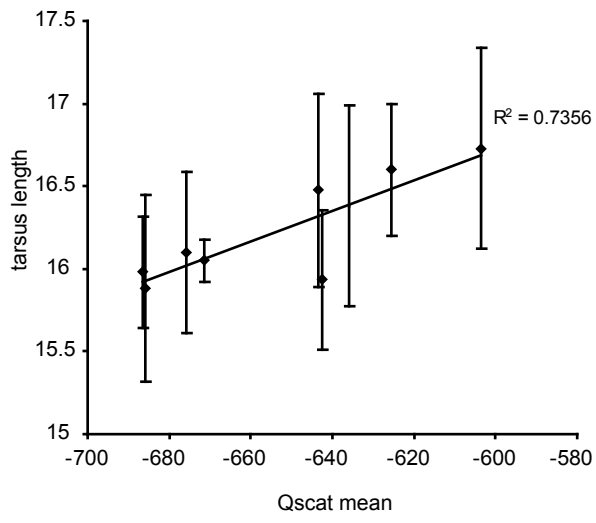

Fig. S9

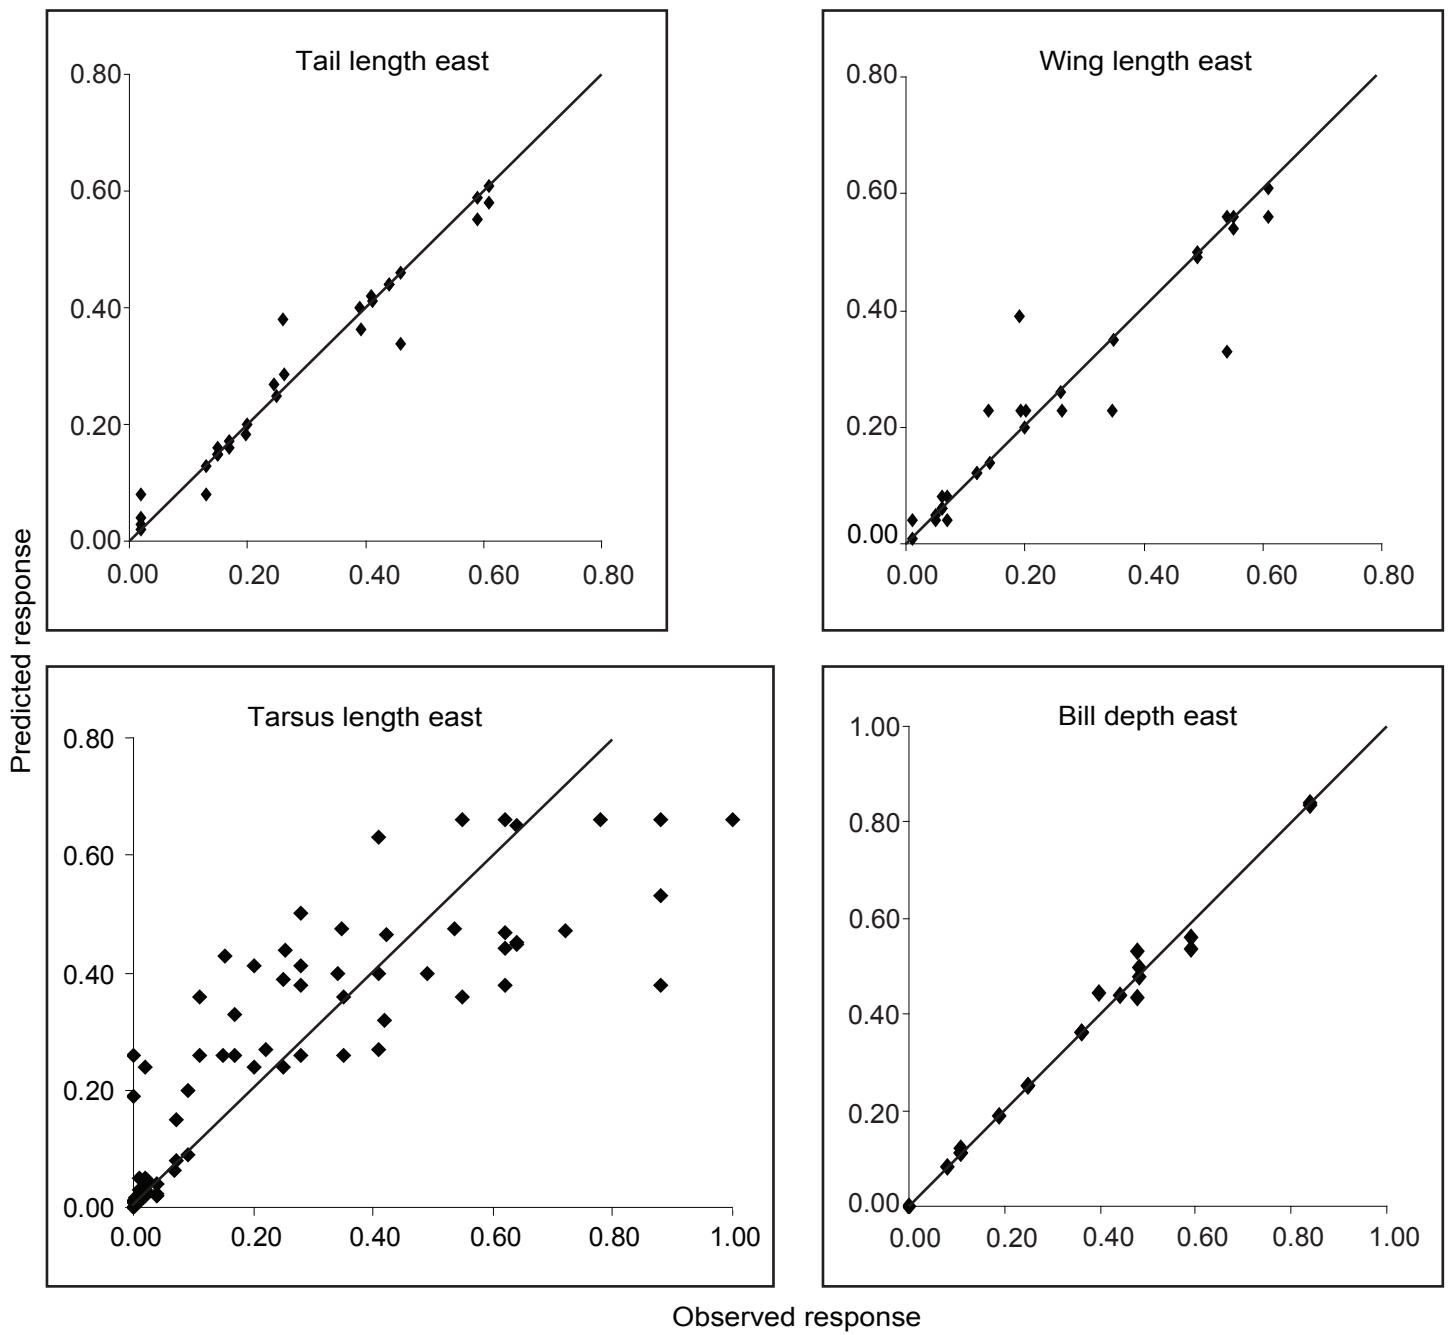

Fig. S10

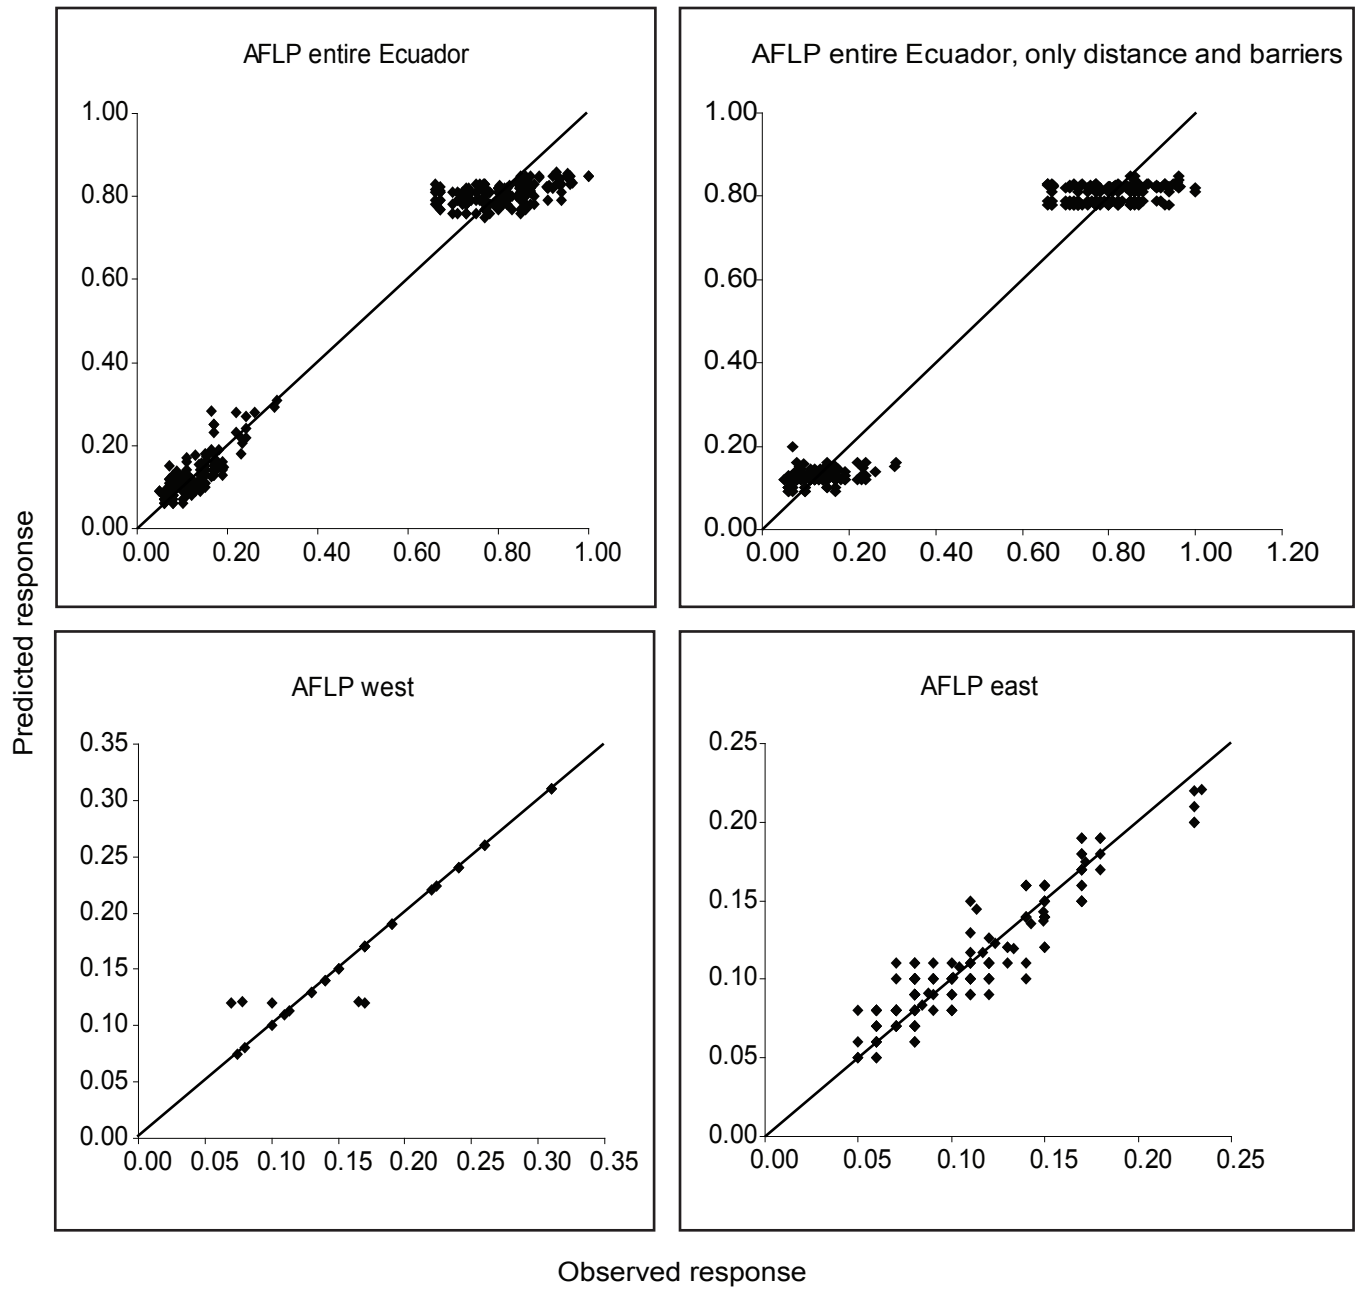

Fig. S11

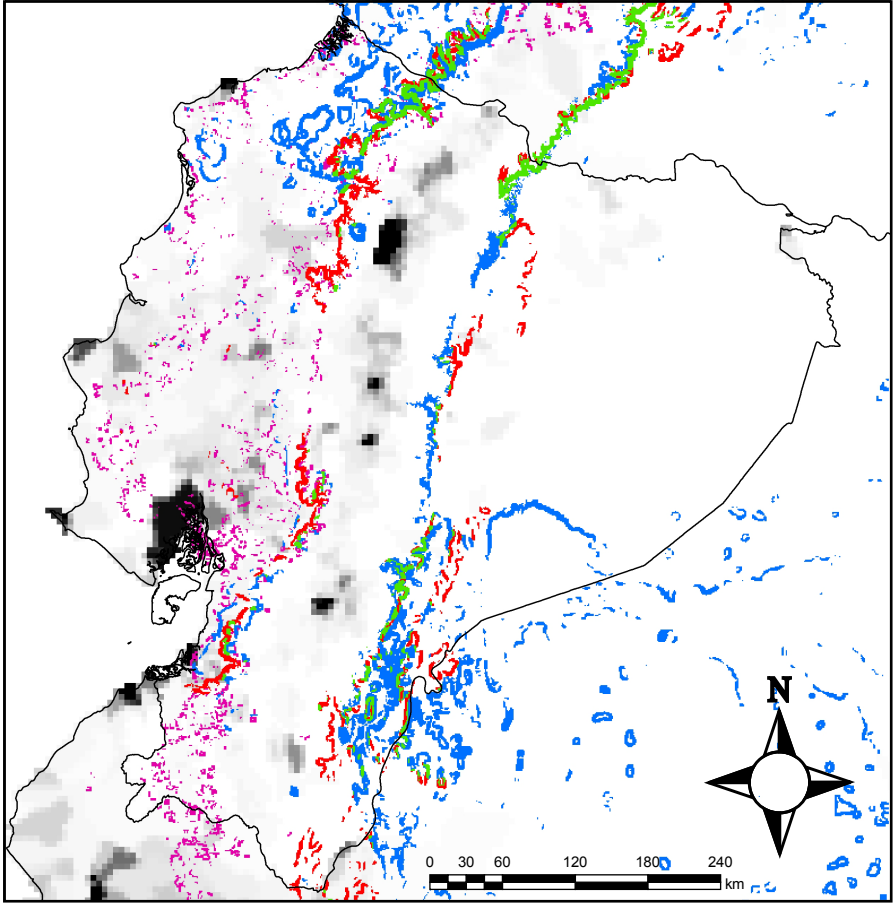

Population density

low  high

Areas with highest 10% rates of change

-  AFLP
-  AFLP+morphology
-  morphology
-  tail/wing length (west)

Fig. S12
