# Supplementary material
Source: PubMed Central journal article supplement (PMC3352455)

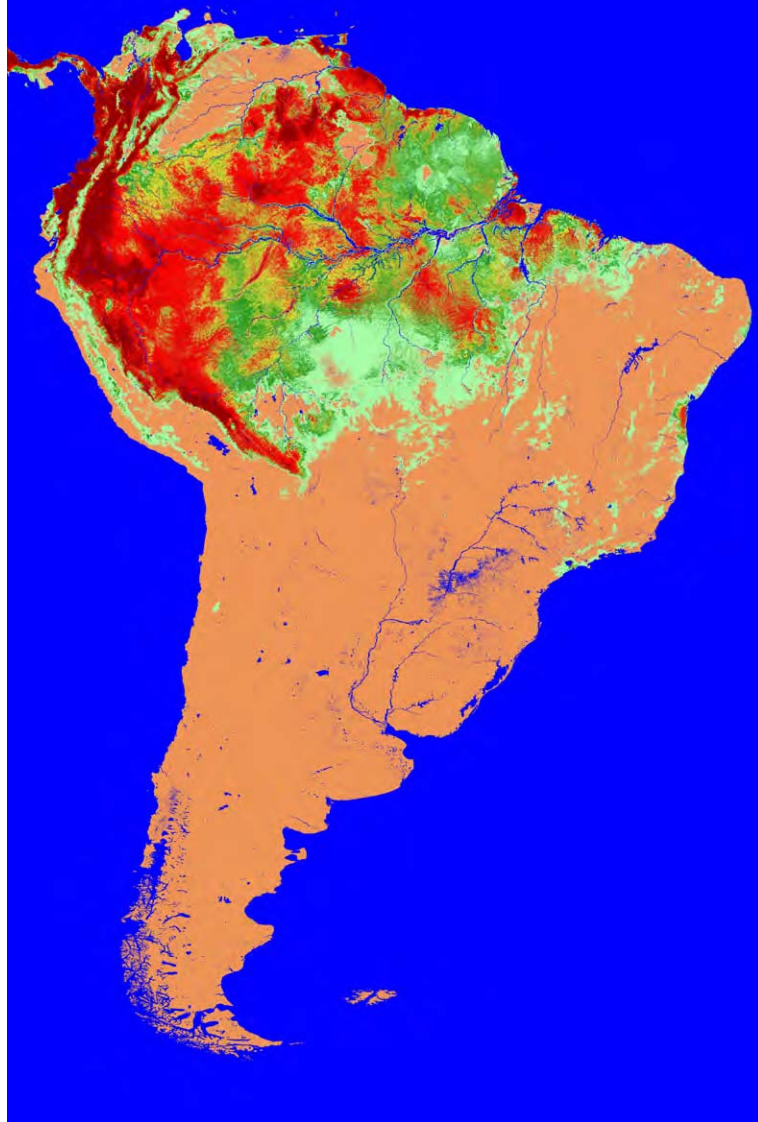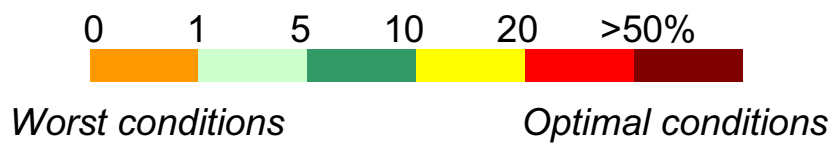

Fig. S1

Supplement: eva0003-0001-SD1.pdf [file eva0003-0001-SD1.pdf]

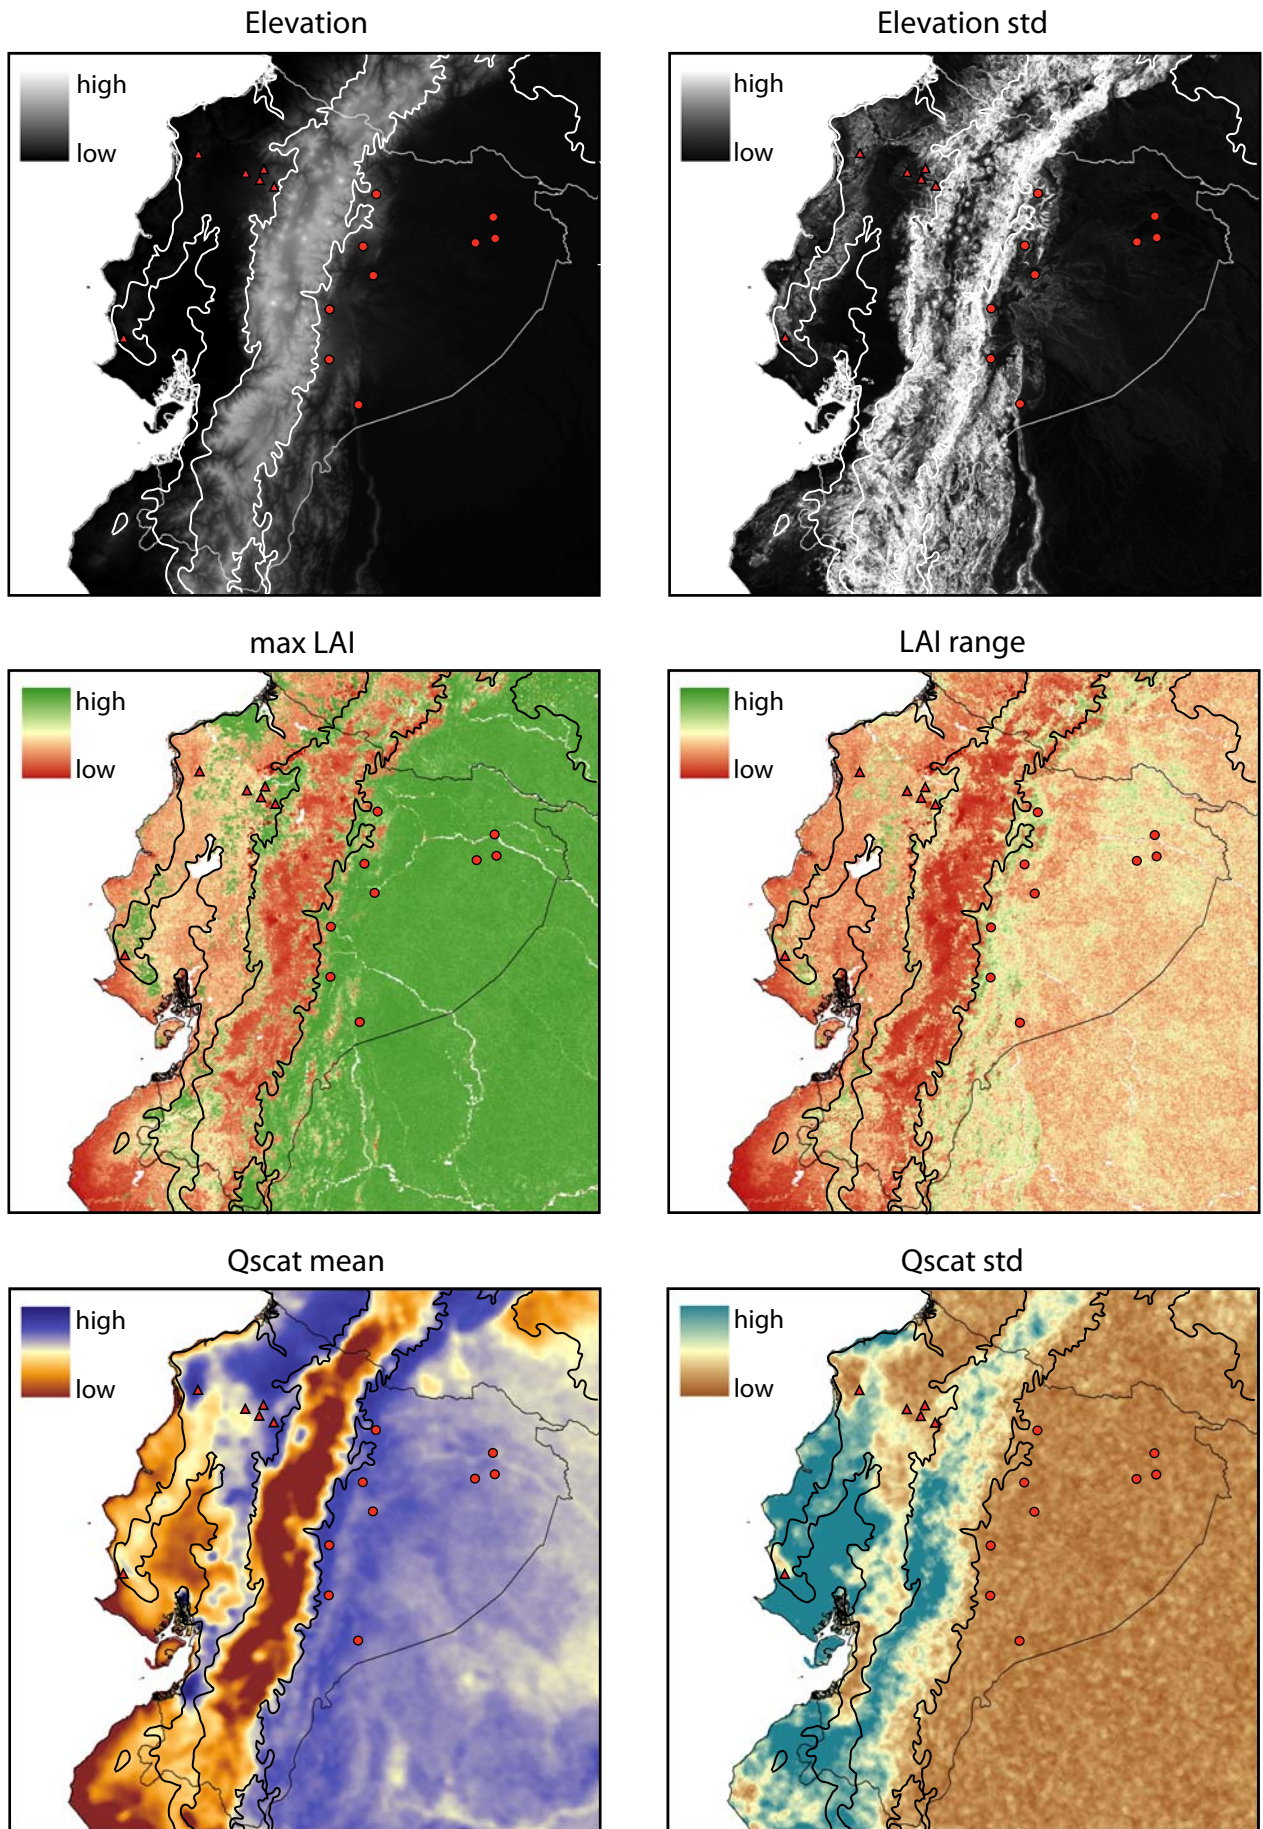

Fig. S2



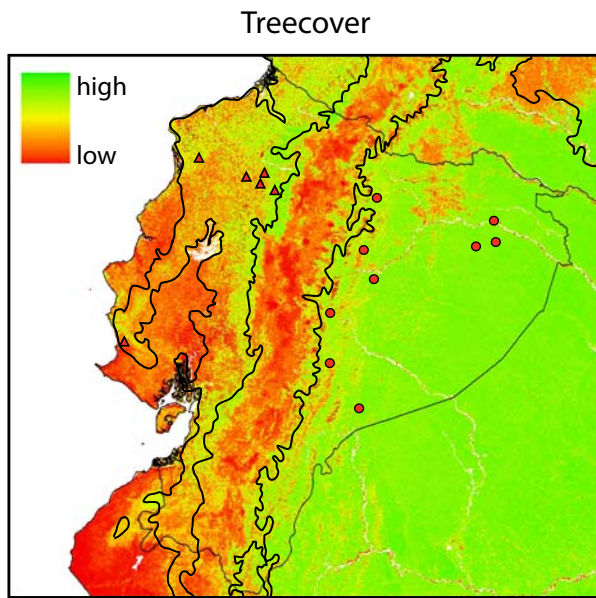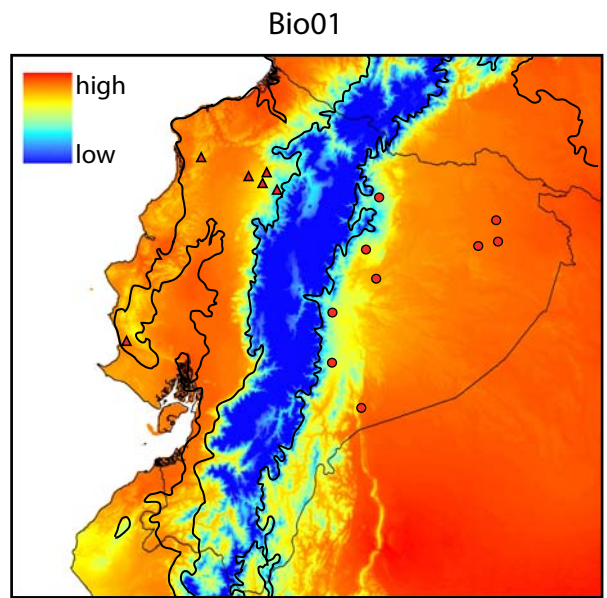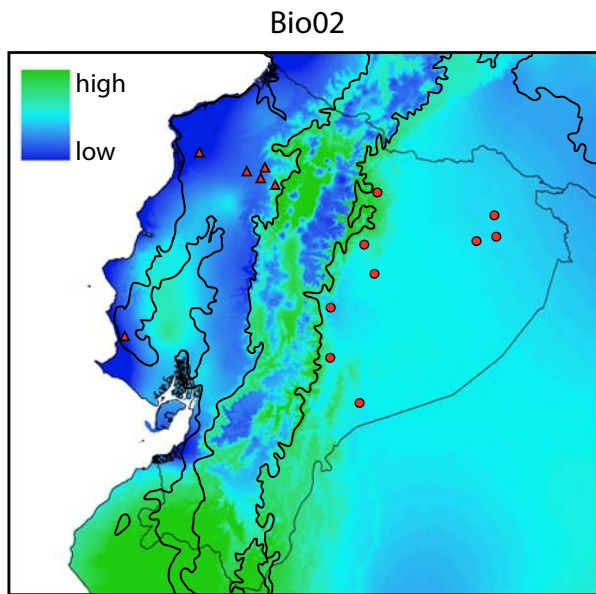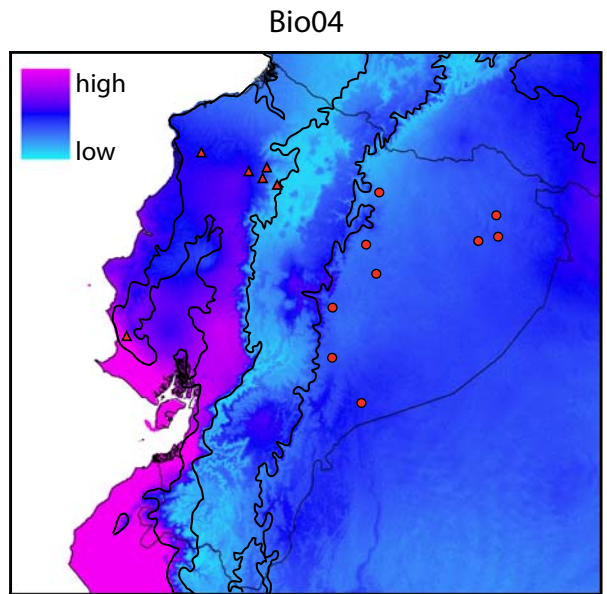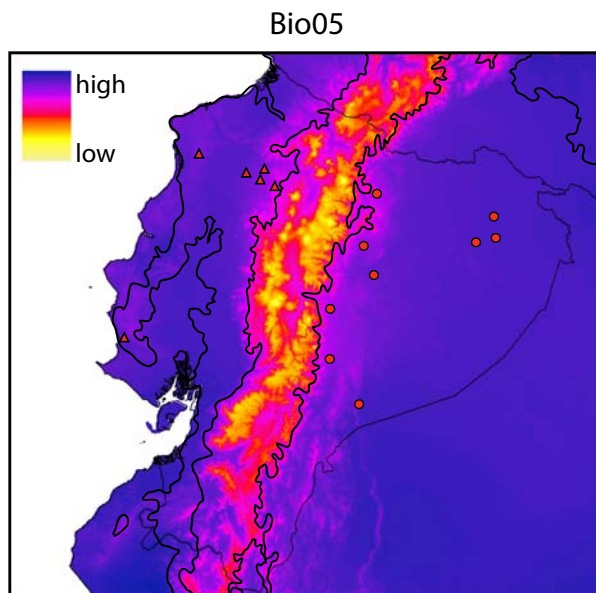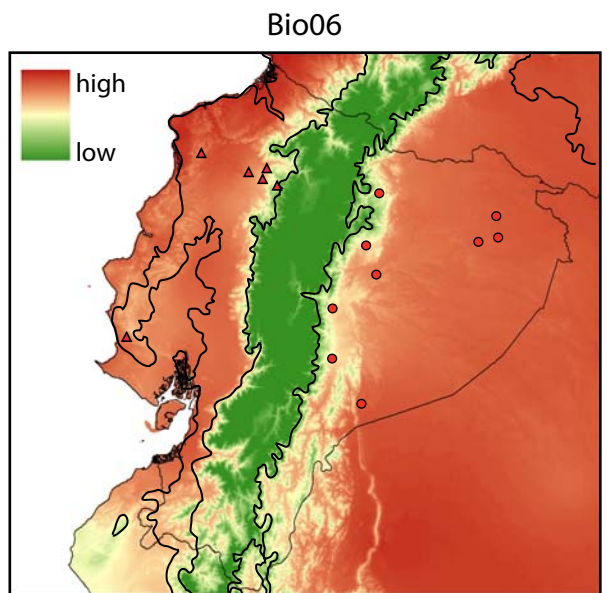

Fig. S2

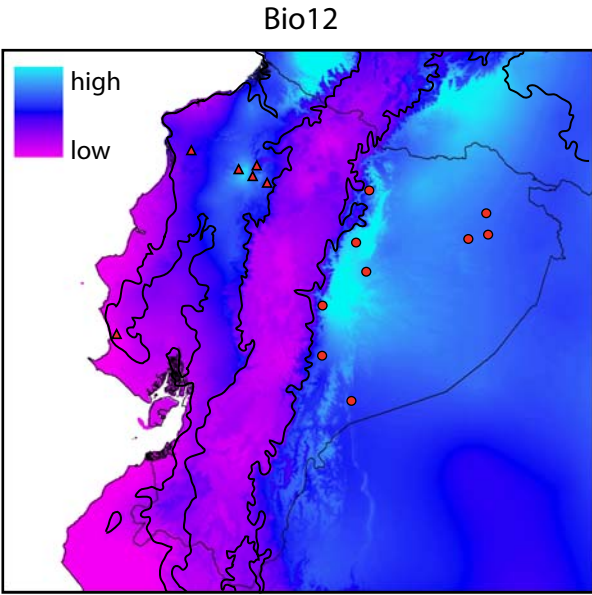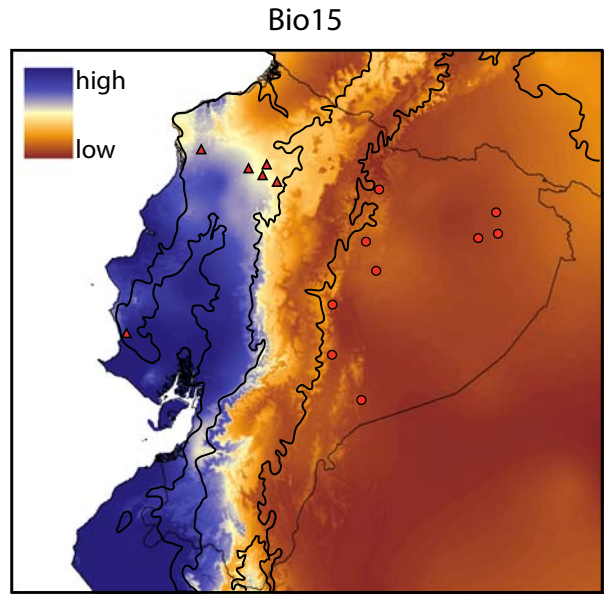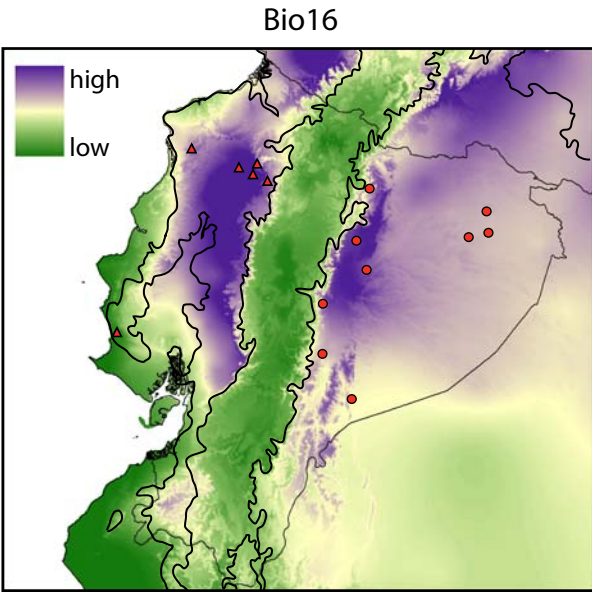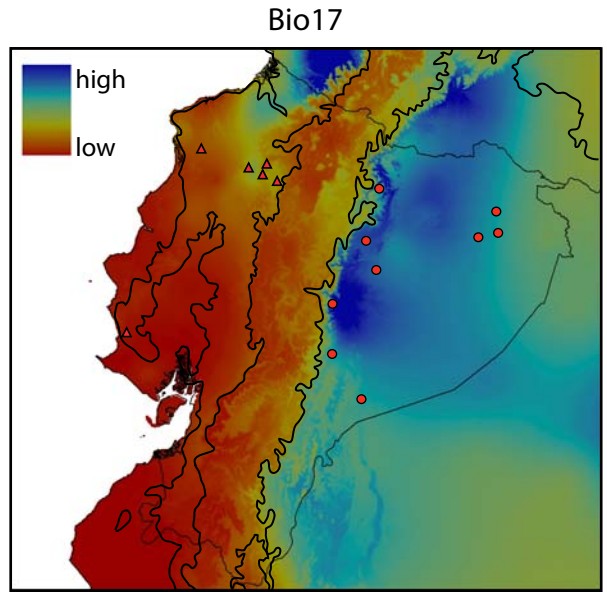

Fig. S2

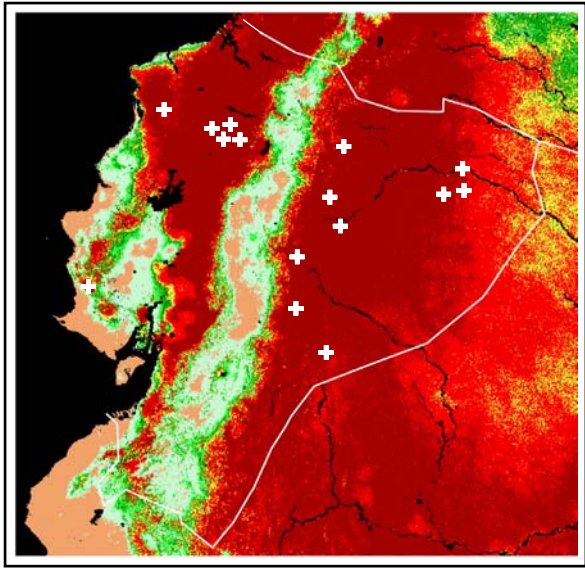

worst  habitat suitability  best

Fig. S3

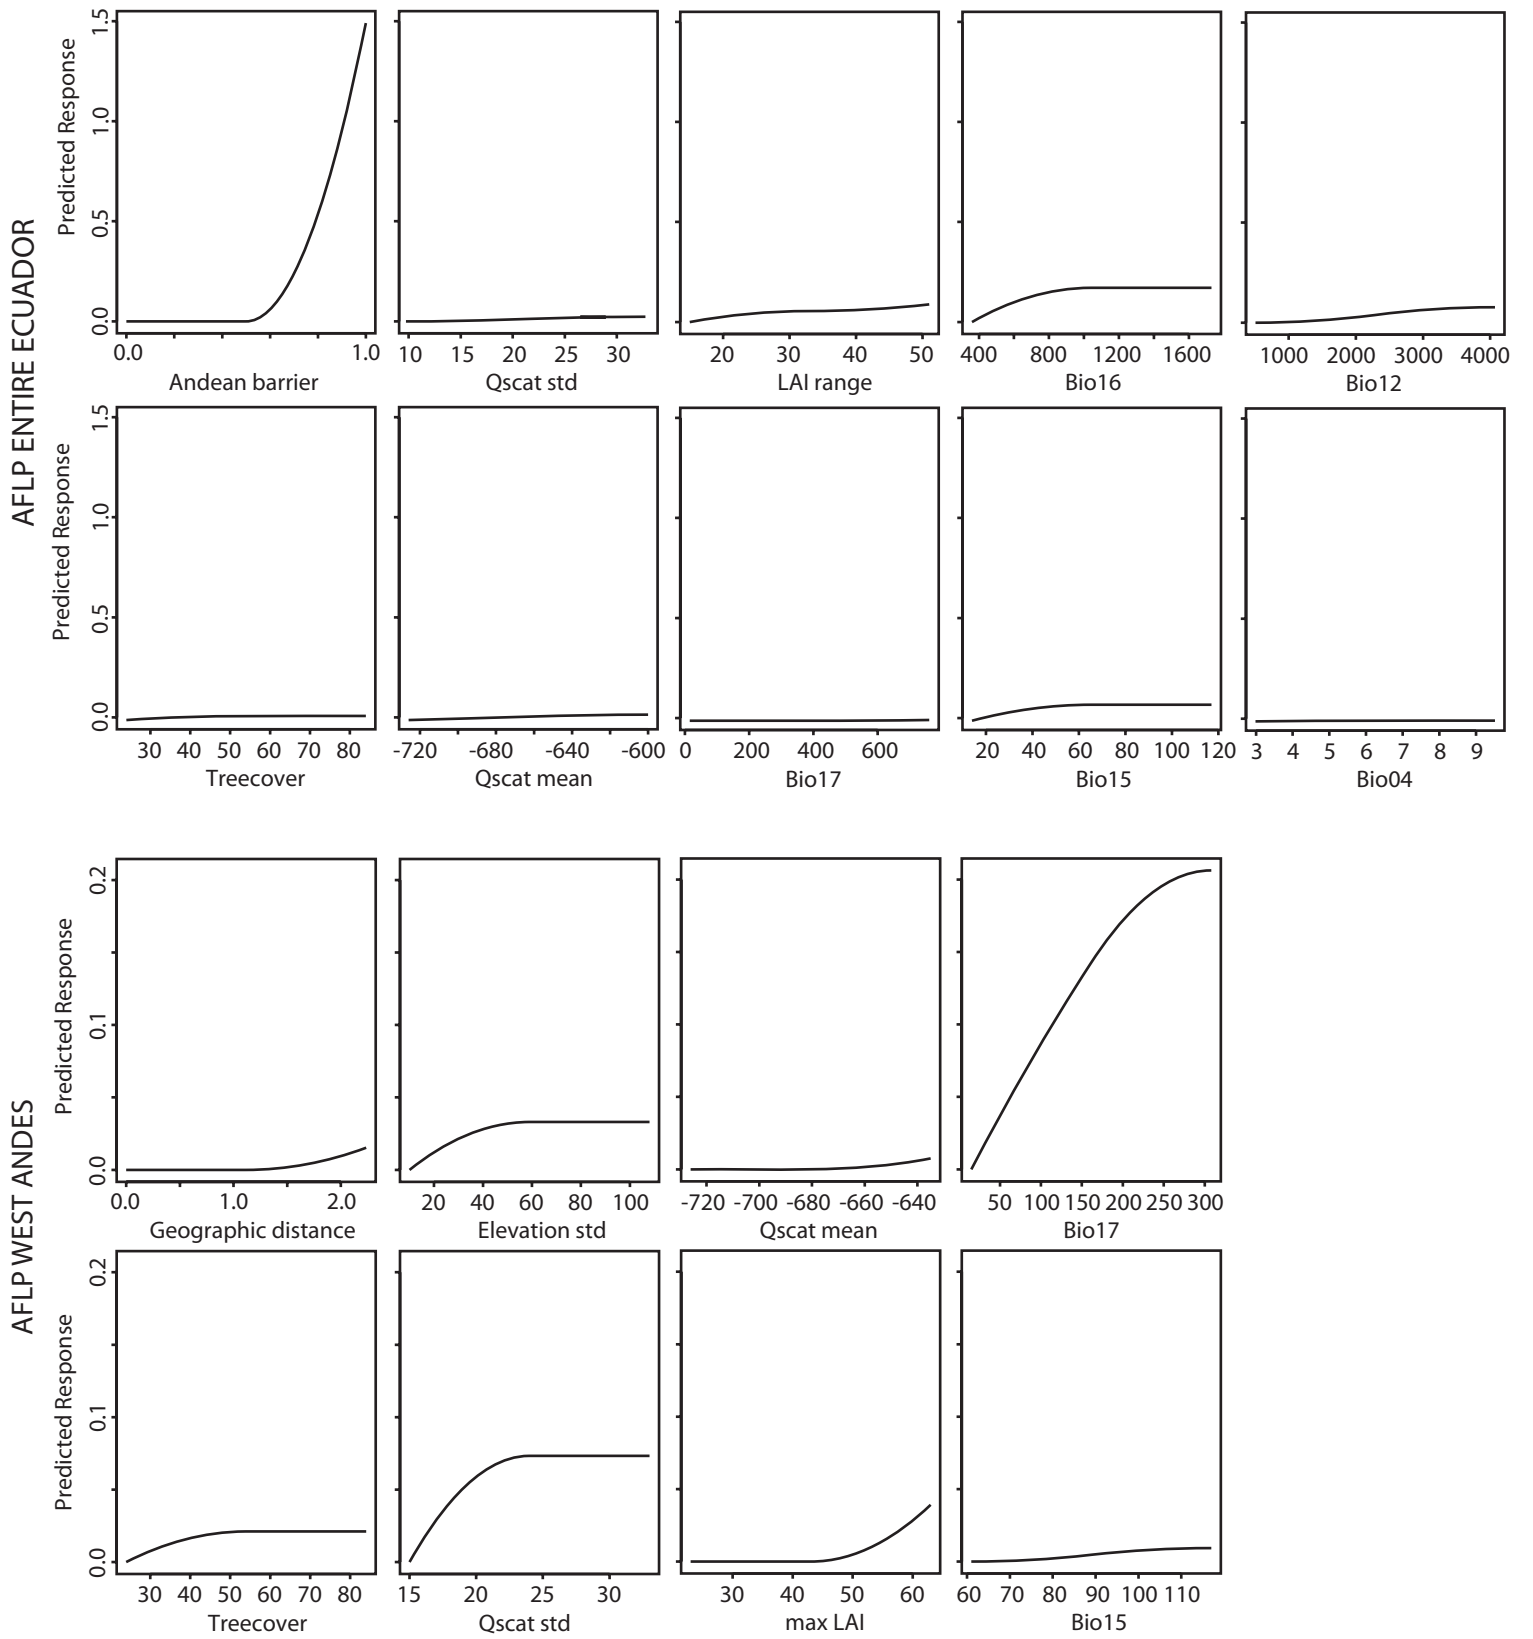

Fig. S4

AFLEP EAST ANDES

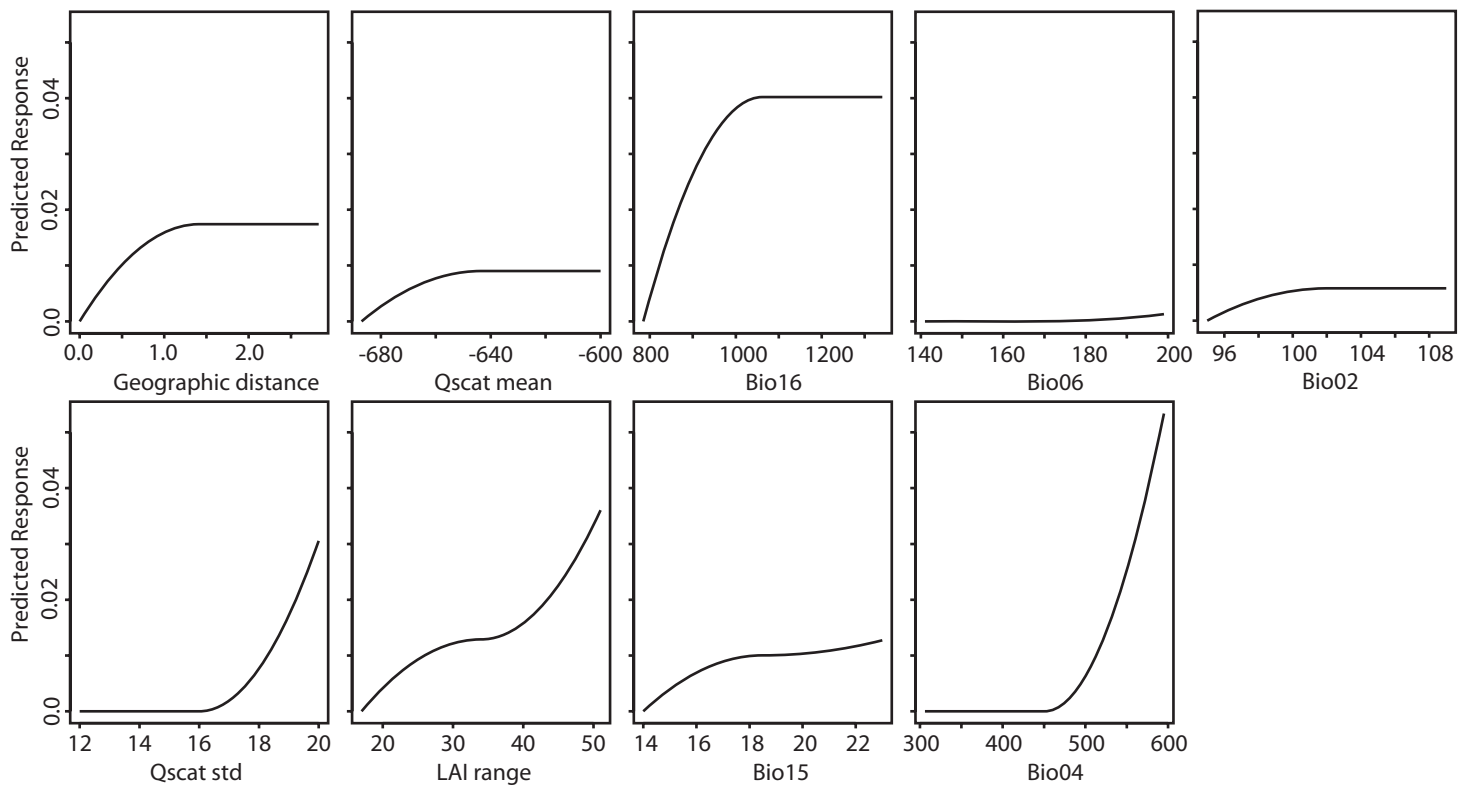

Fig. S4



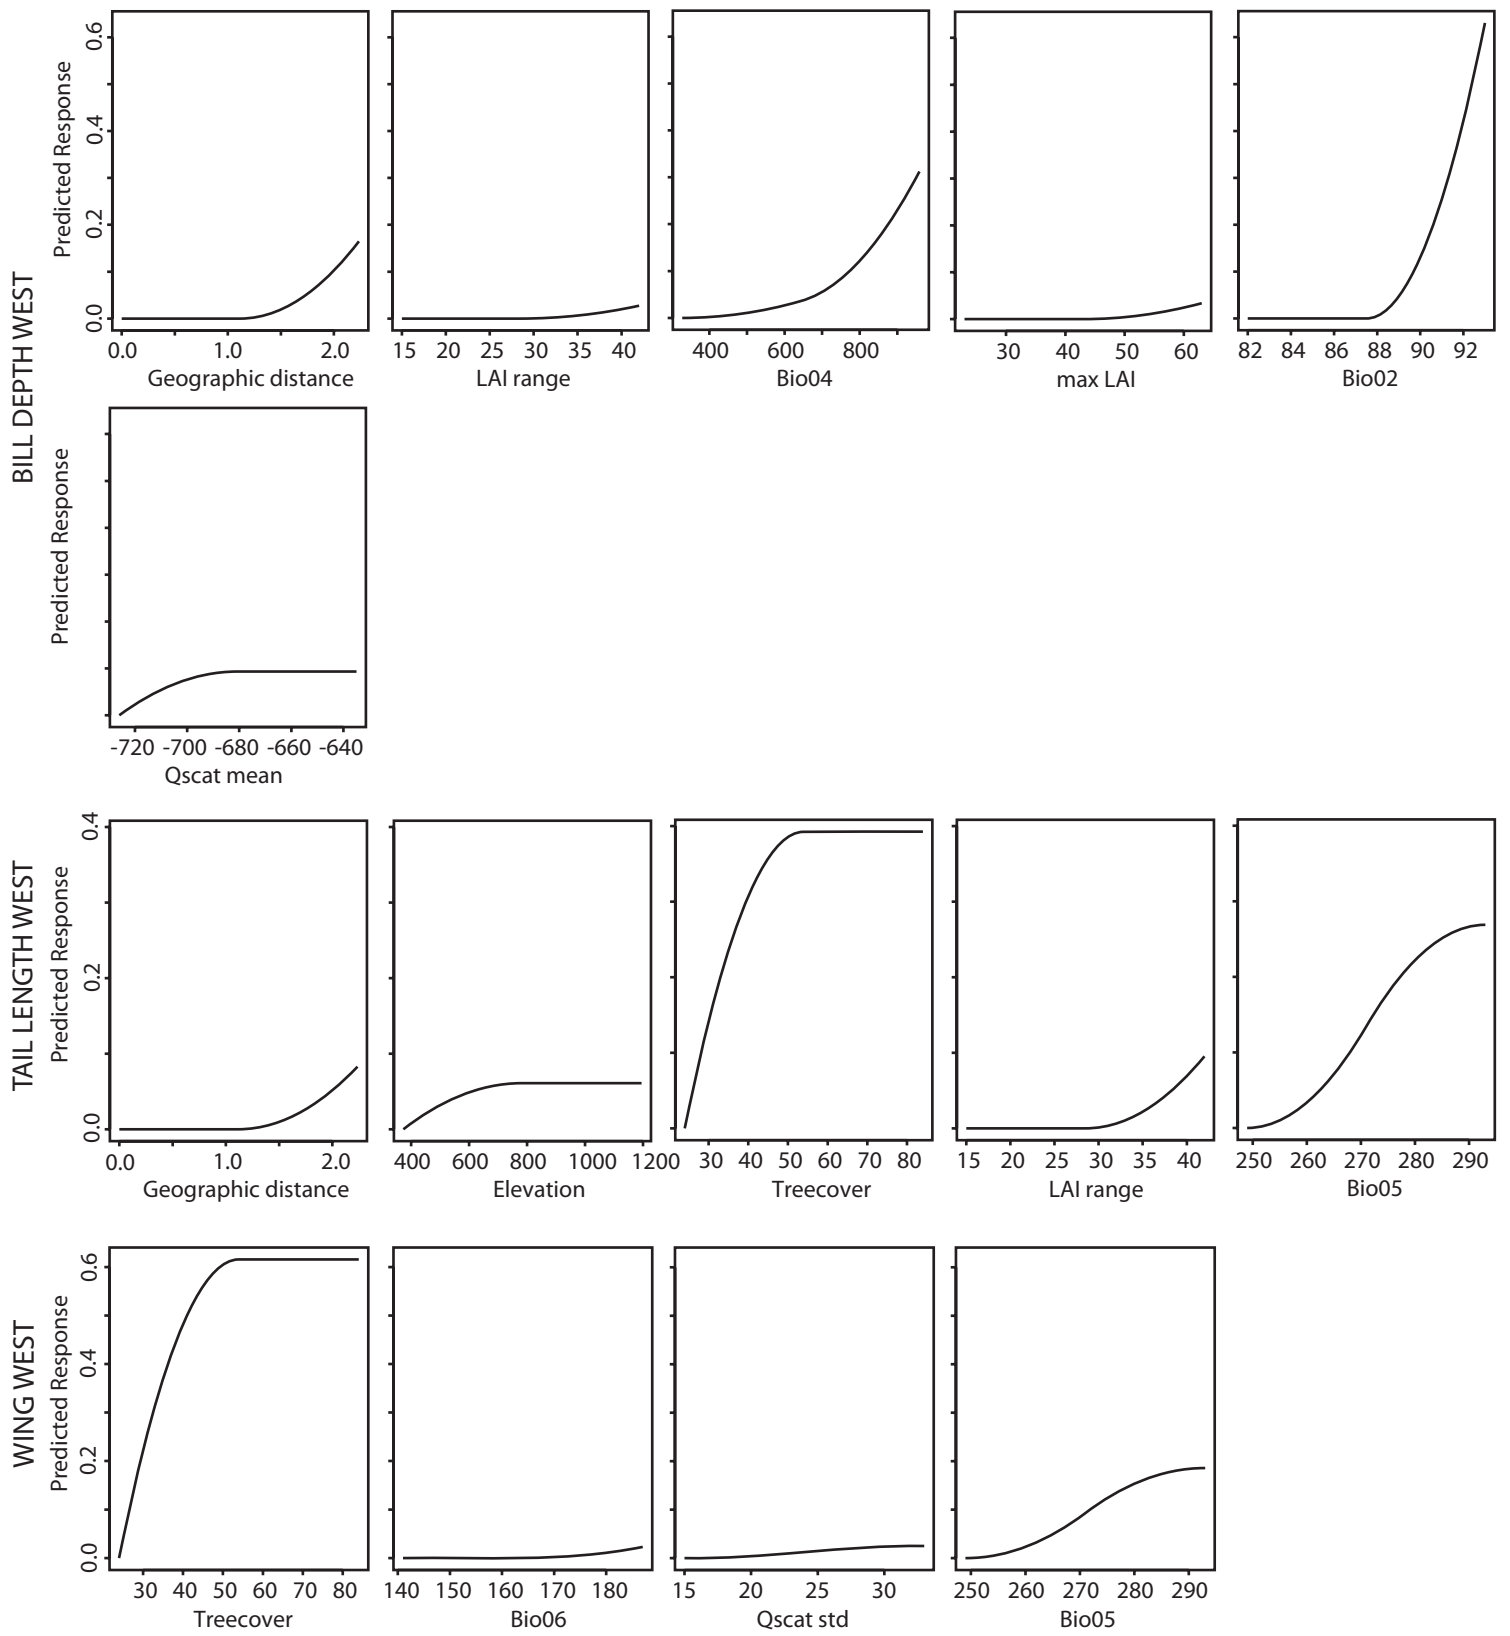

Fig. S4

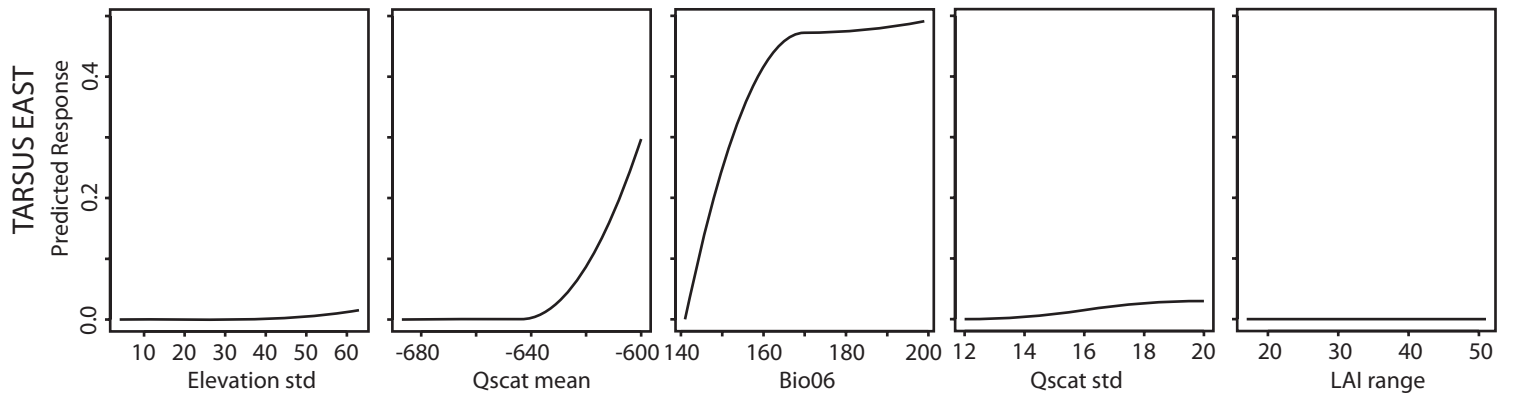

Fig. S4

Supplement: eva0003-0001-SD2.pdf [file eva0003-0001-SD2.pdf]
